# Supplementary material for: Extinction Risk and Diversification Are Linked in a Plant Biodiversity Hotspot
Source: PubMed Central journal article supplement (PMC3101198; doi:10.1371/journal.pbio.1000620), 2011-05-24

**Figure S1. Disparity through time in range size.** a) Cypereae, b) *Disa*, c) *Indiogofera*, d) *Lachnaea*, e) *Muraltia*, f) *Pentaschistis*, g) *Podalyrieae*, h) Restionaceae, i) *Zygophyllum*, j) *Protea*, k) *Moraea*. Solid line = observed values, dashed red line = Brownian expectations, dashed blue line = punctuated model (range asymmetry factor = 2, s.d. for evolutionary drift = 2, evolutionary trend = 0.3; Materials and Methods). Clade age is scaled between 0 and 1, with 0 zero representing clade origins, and 1 representing the present day. Compare with Figure 2.

(a)

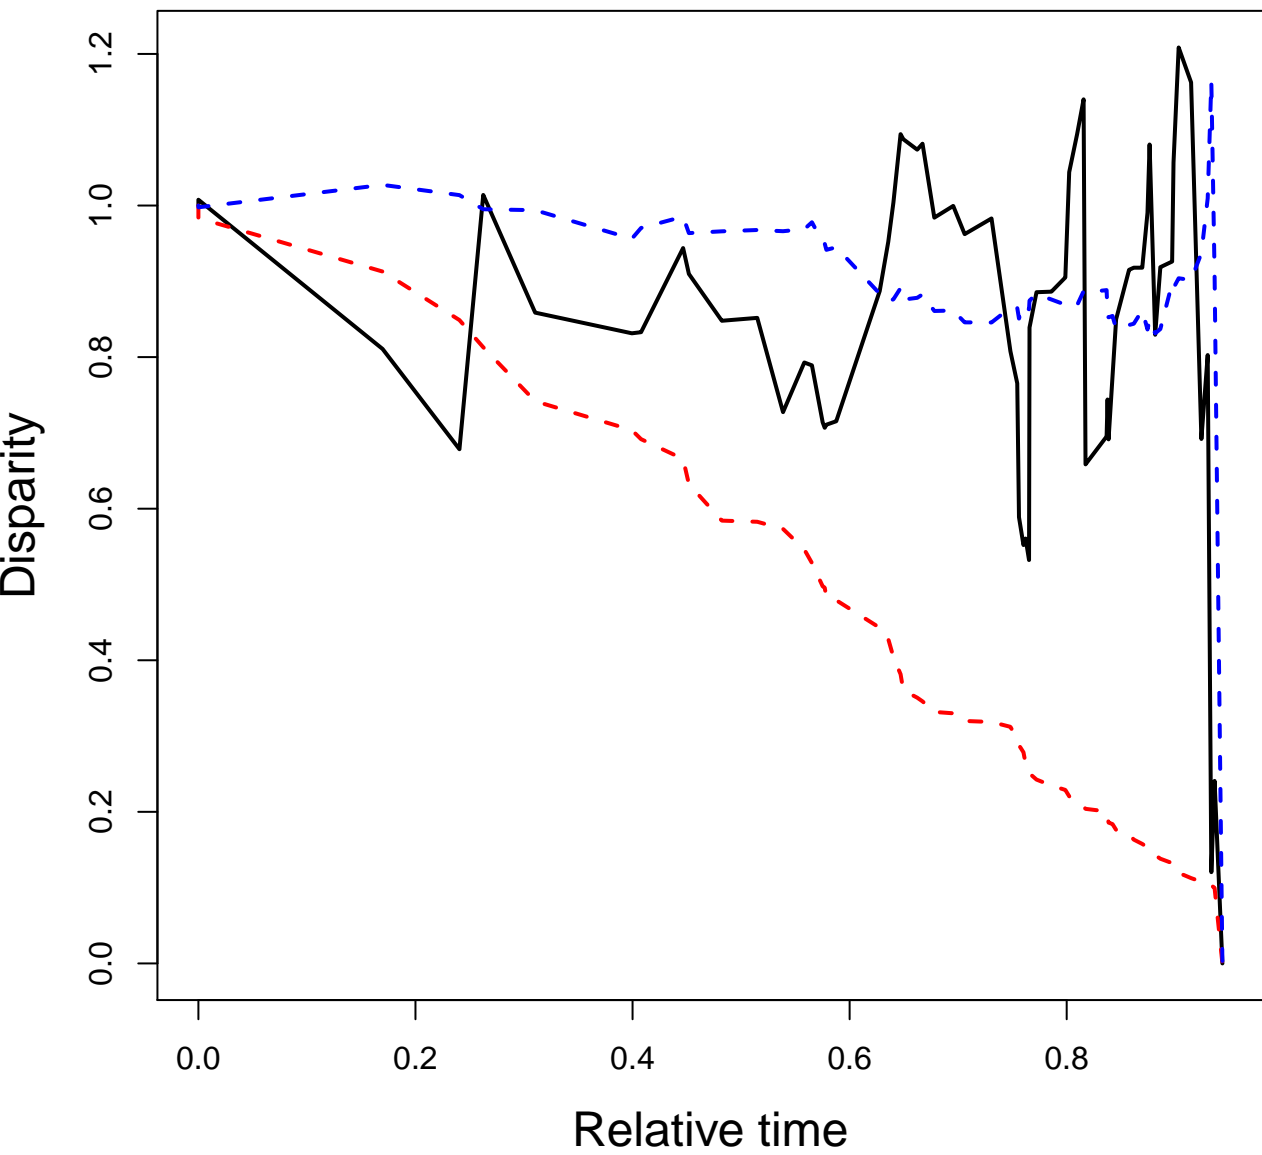

(b)

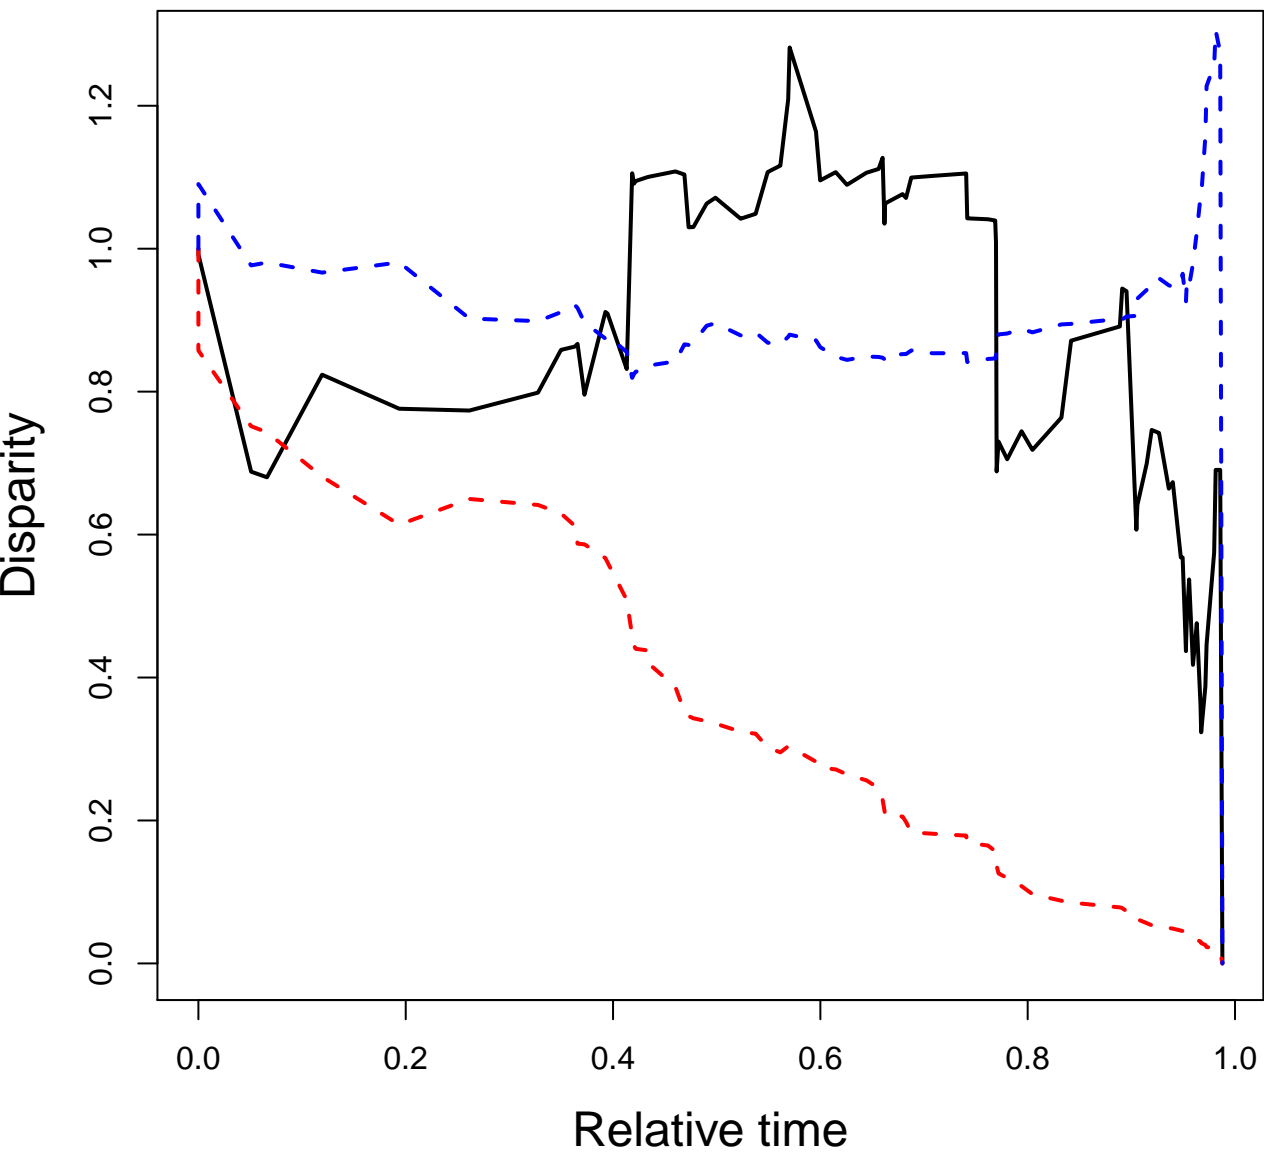

(c)

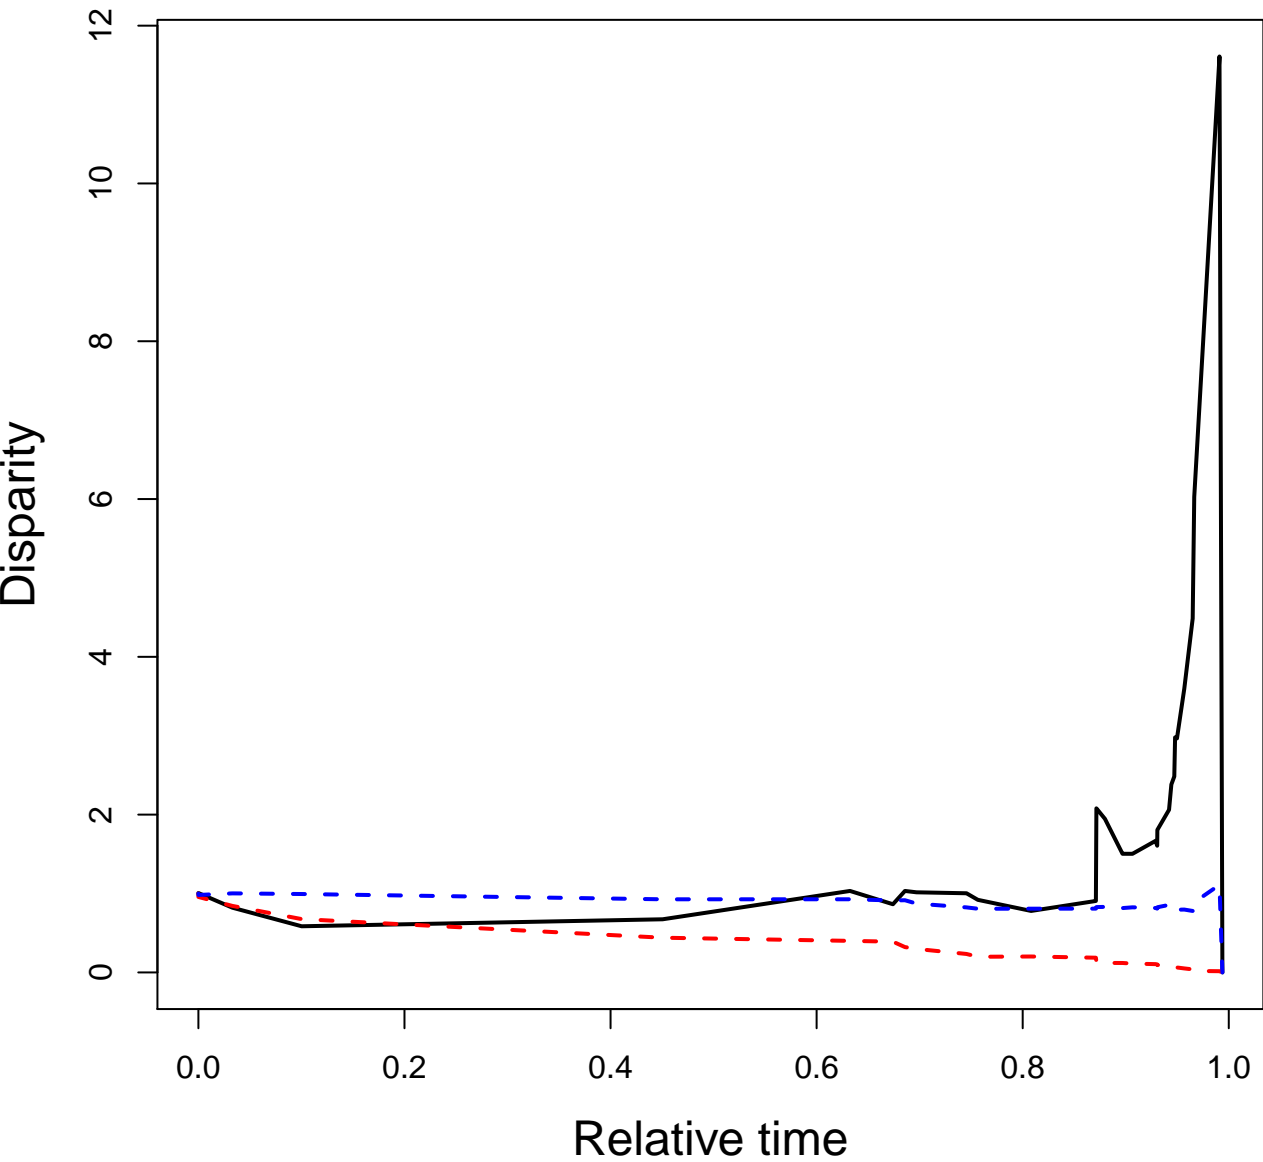

(d)

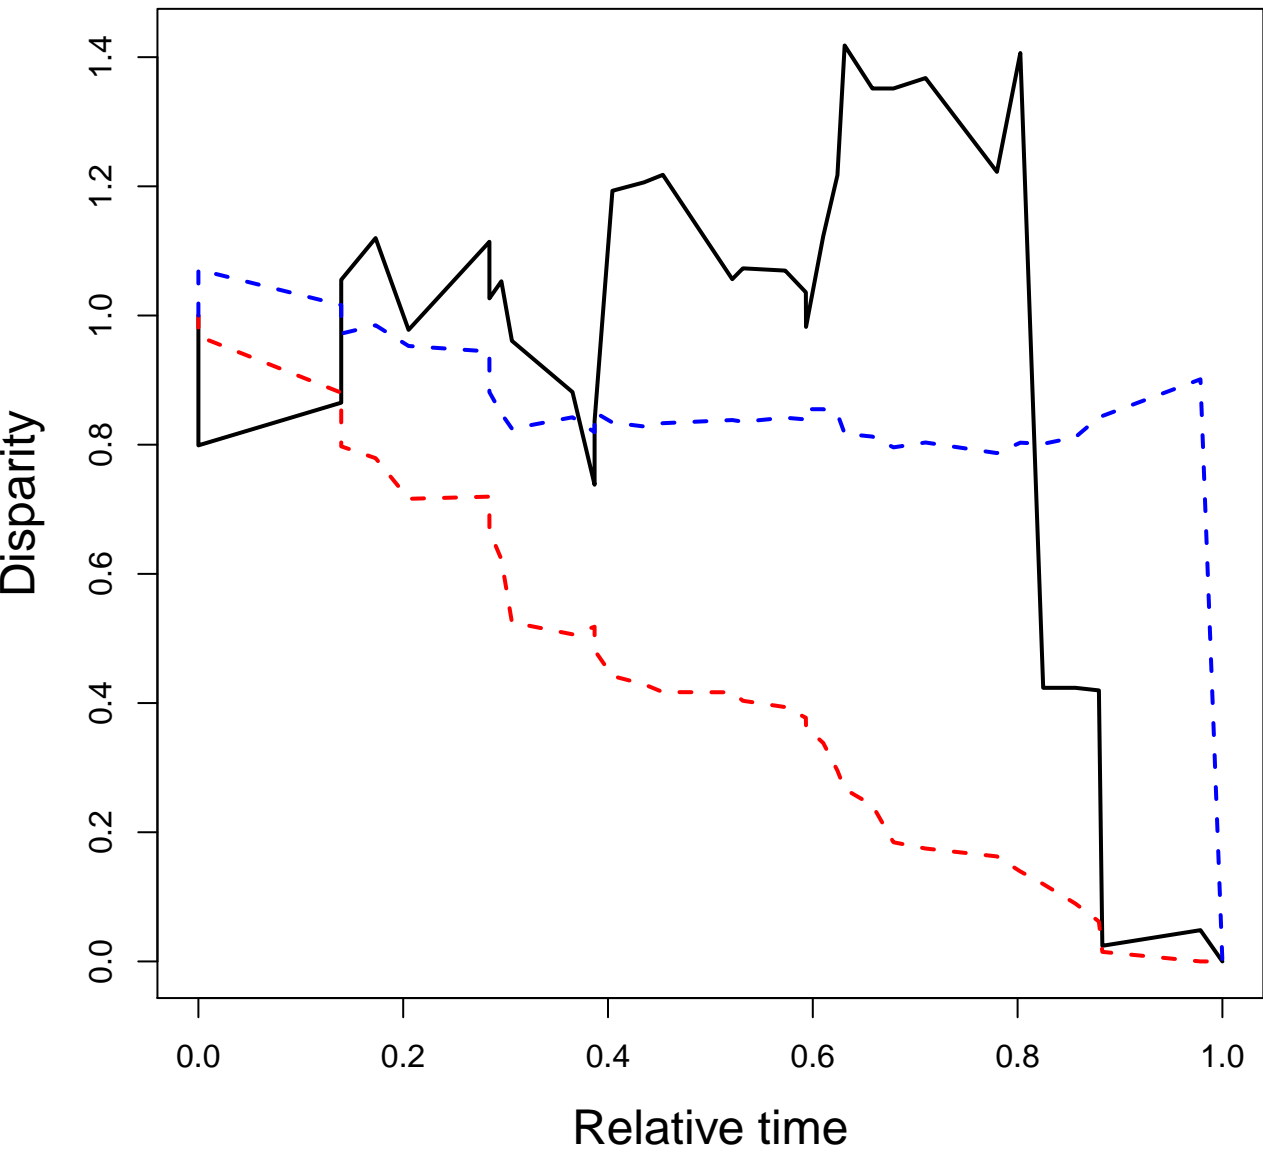

(e)

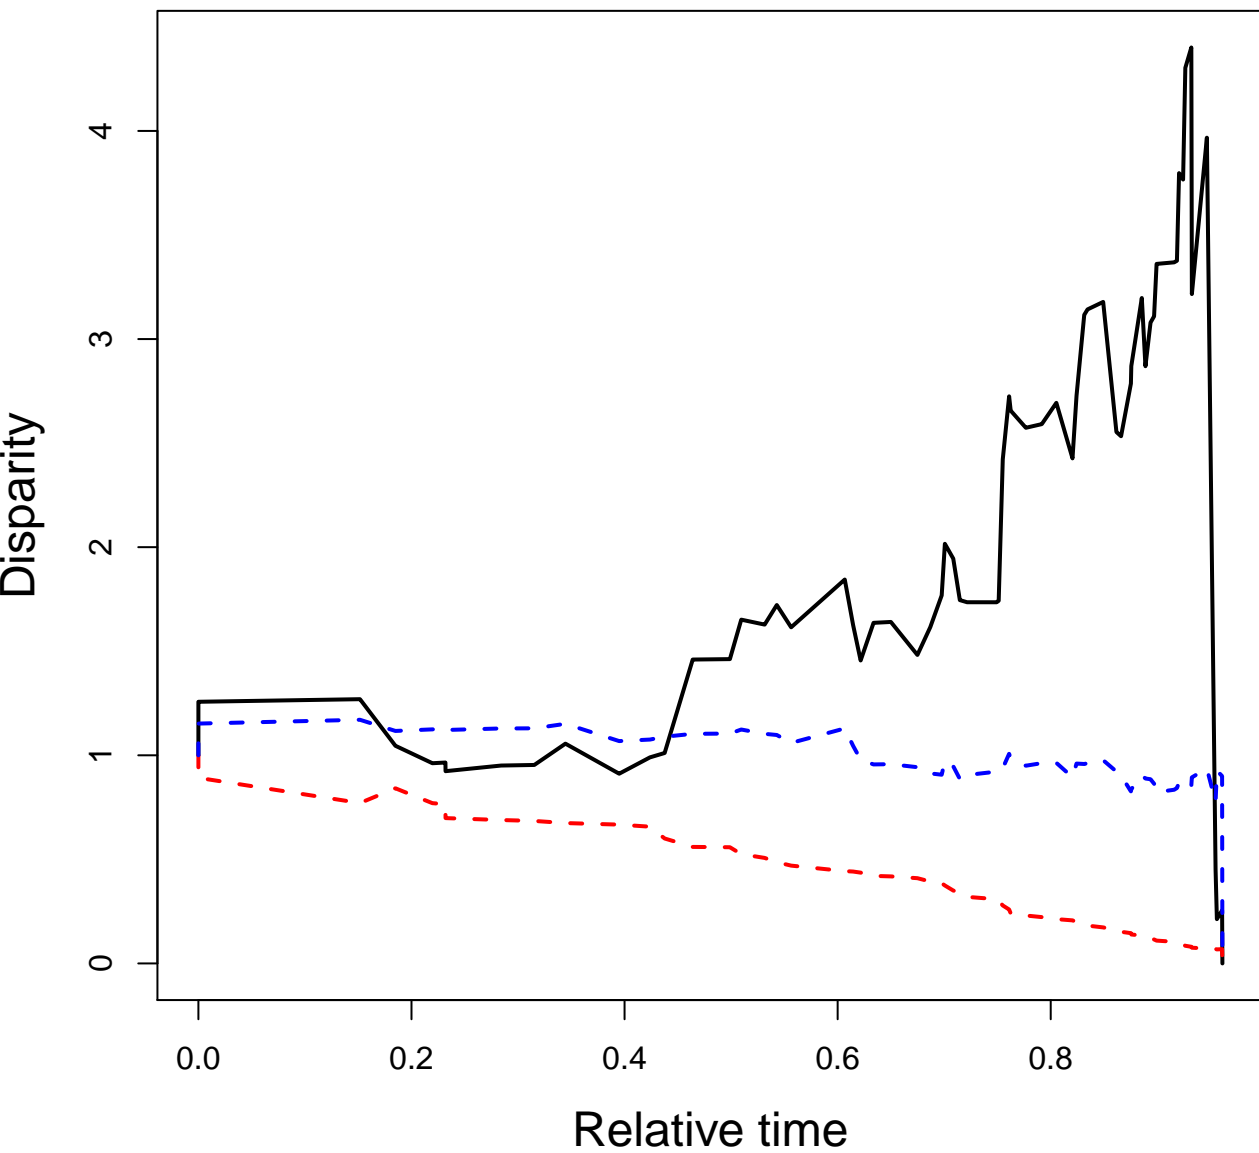

(f)

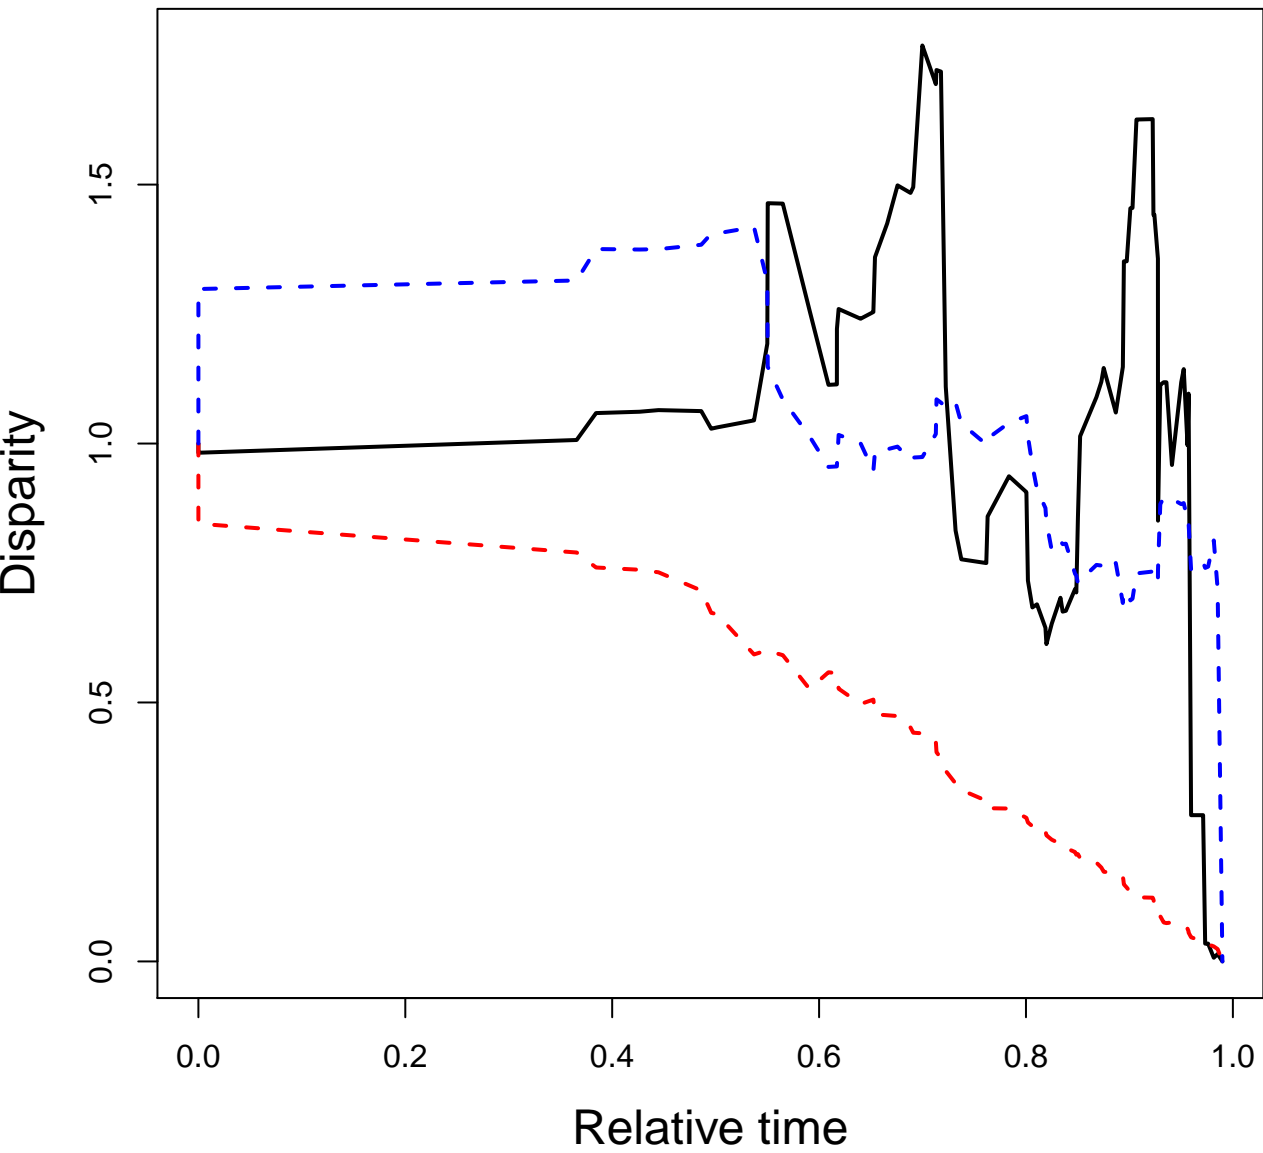

(g)

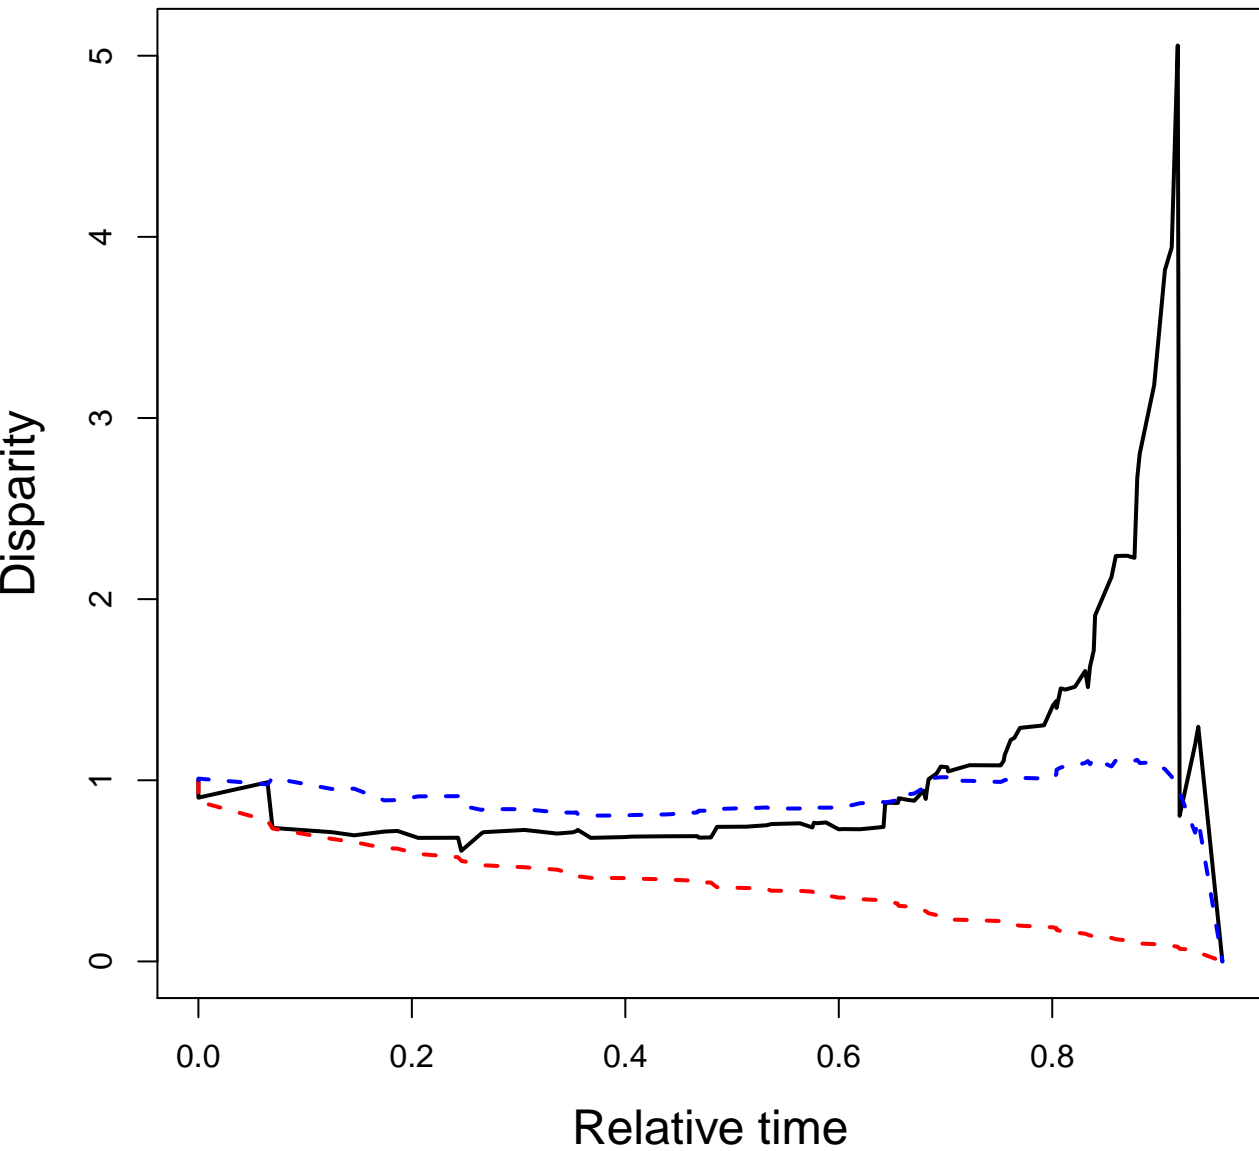



(h)

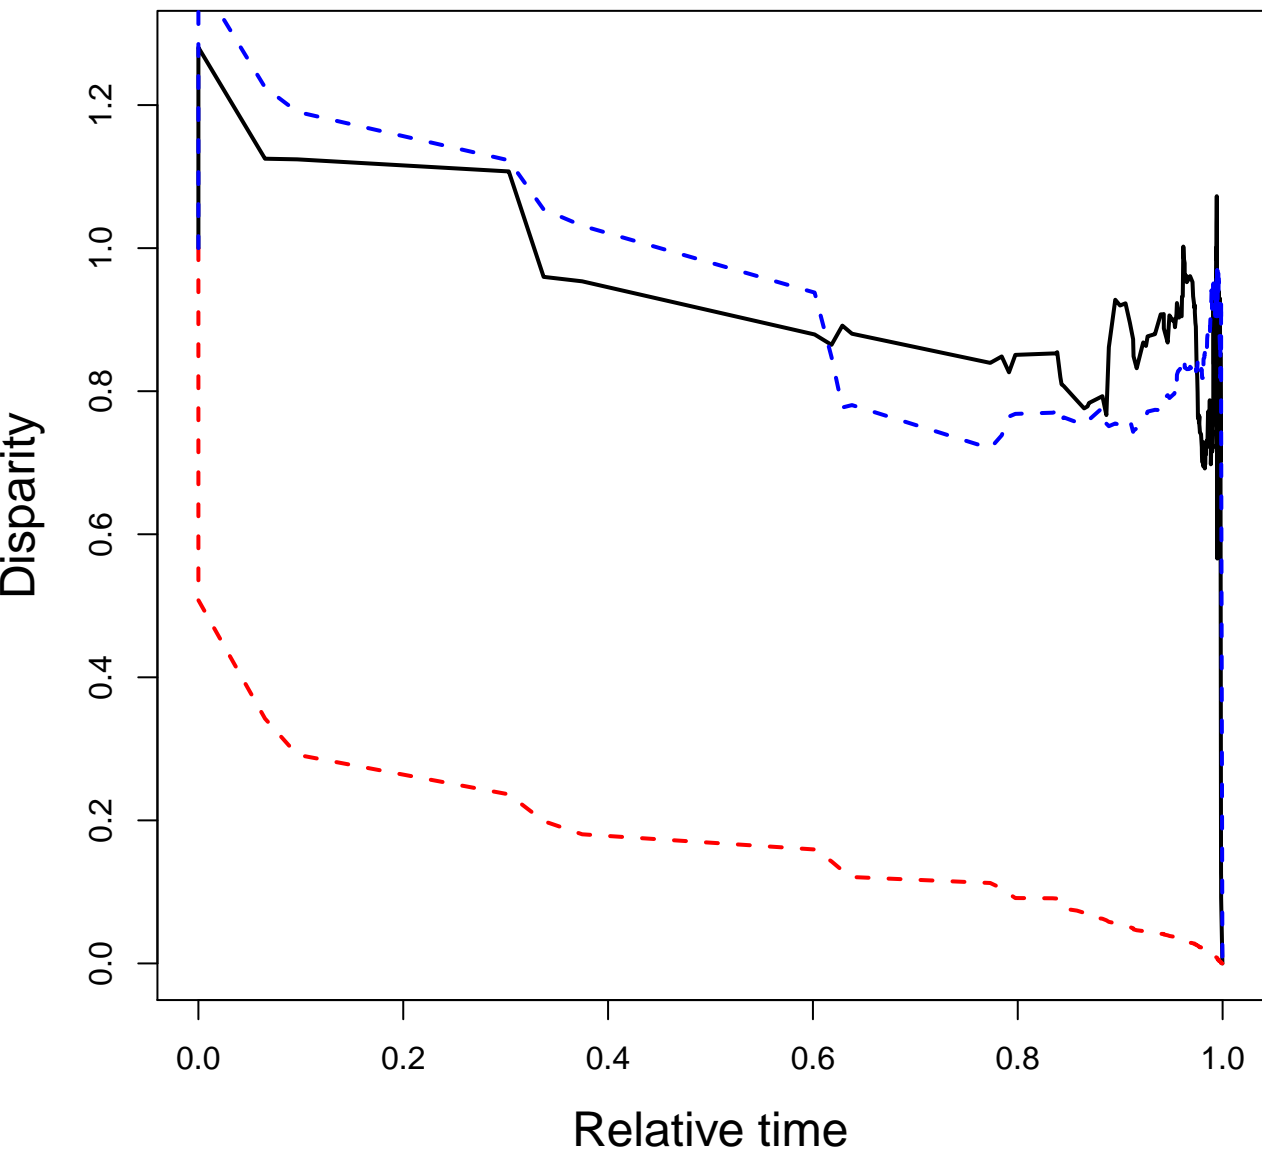

(i)

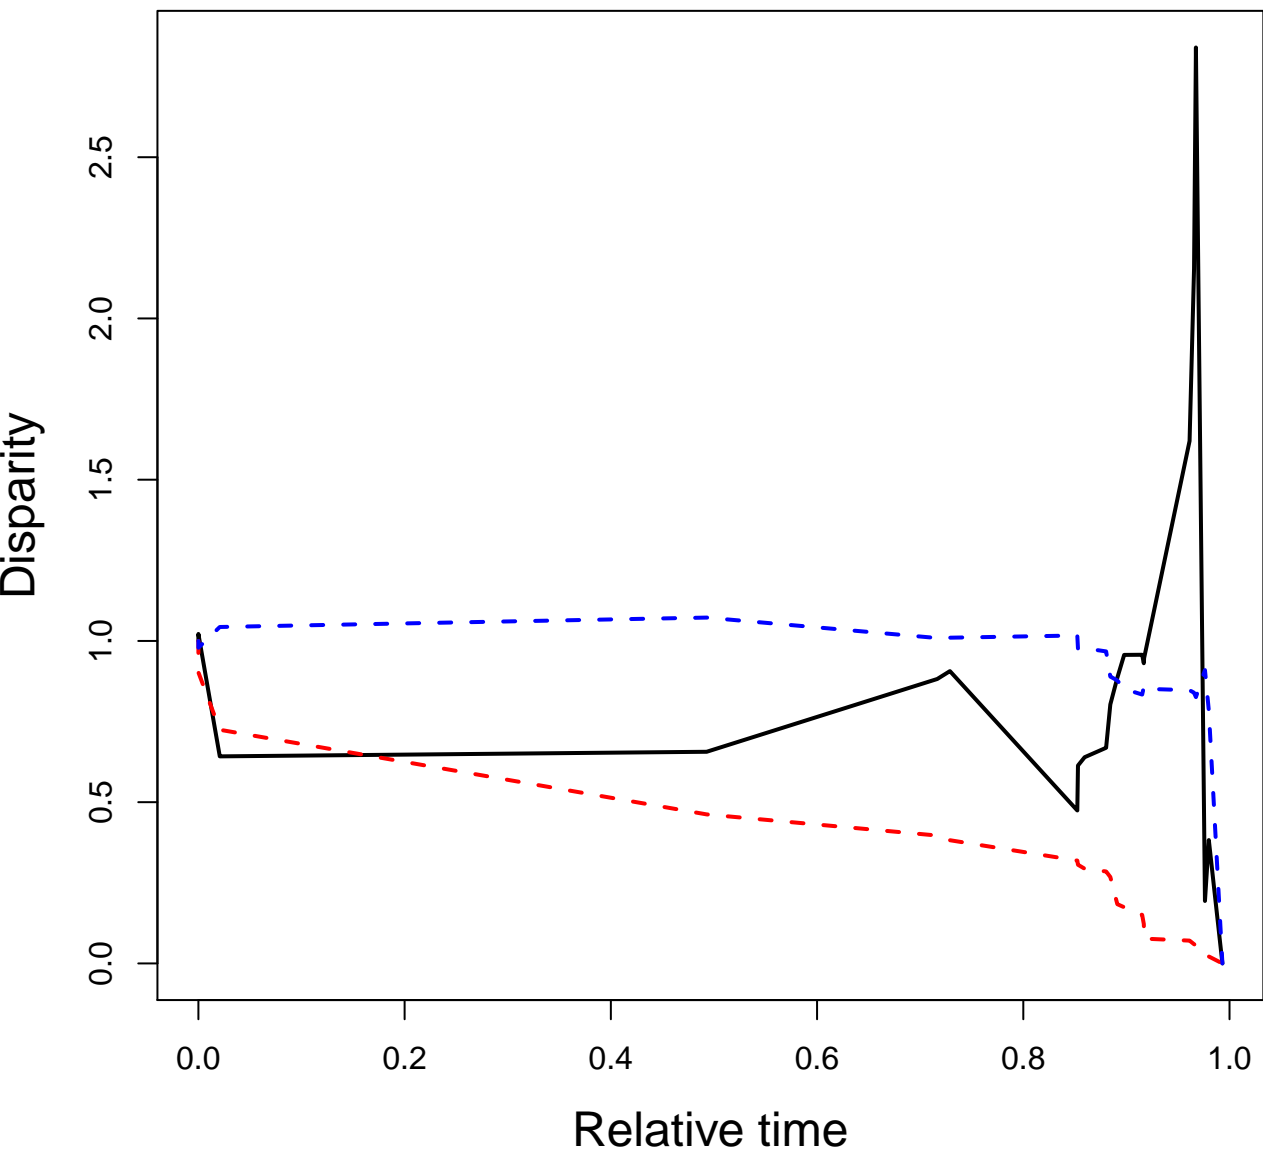

(j)

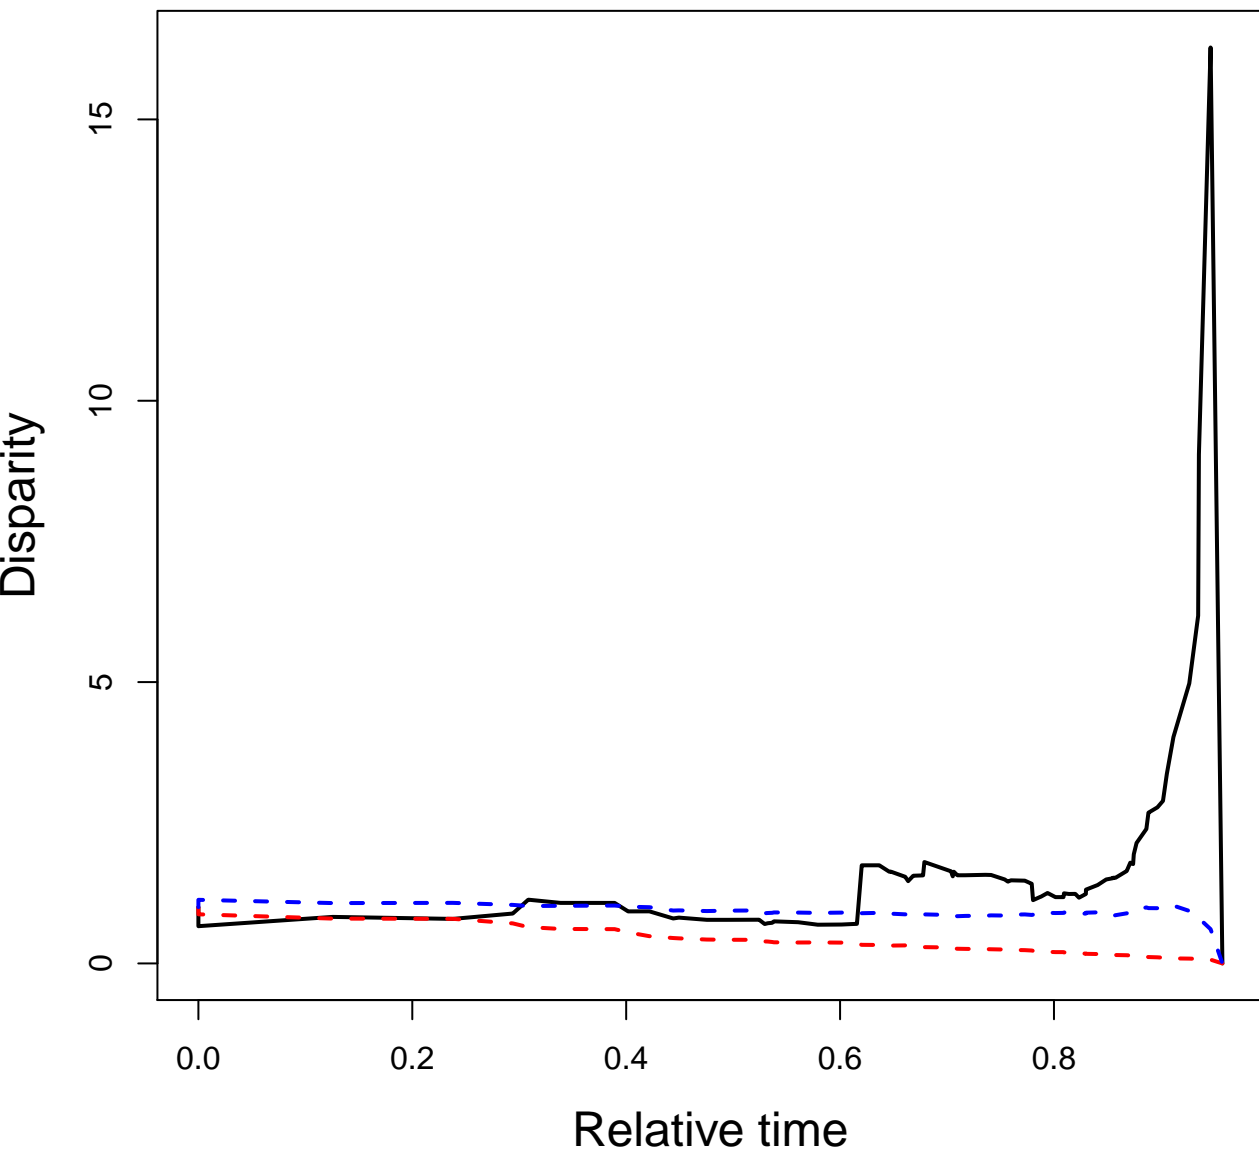

(k)

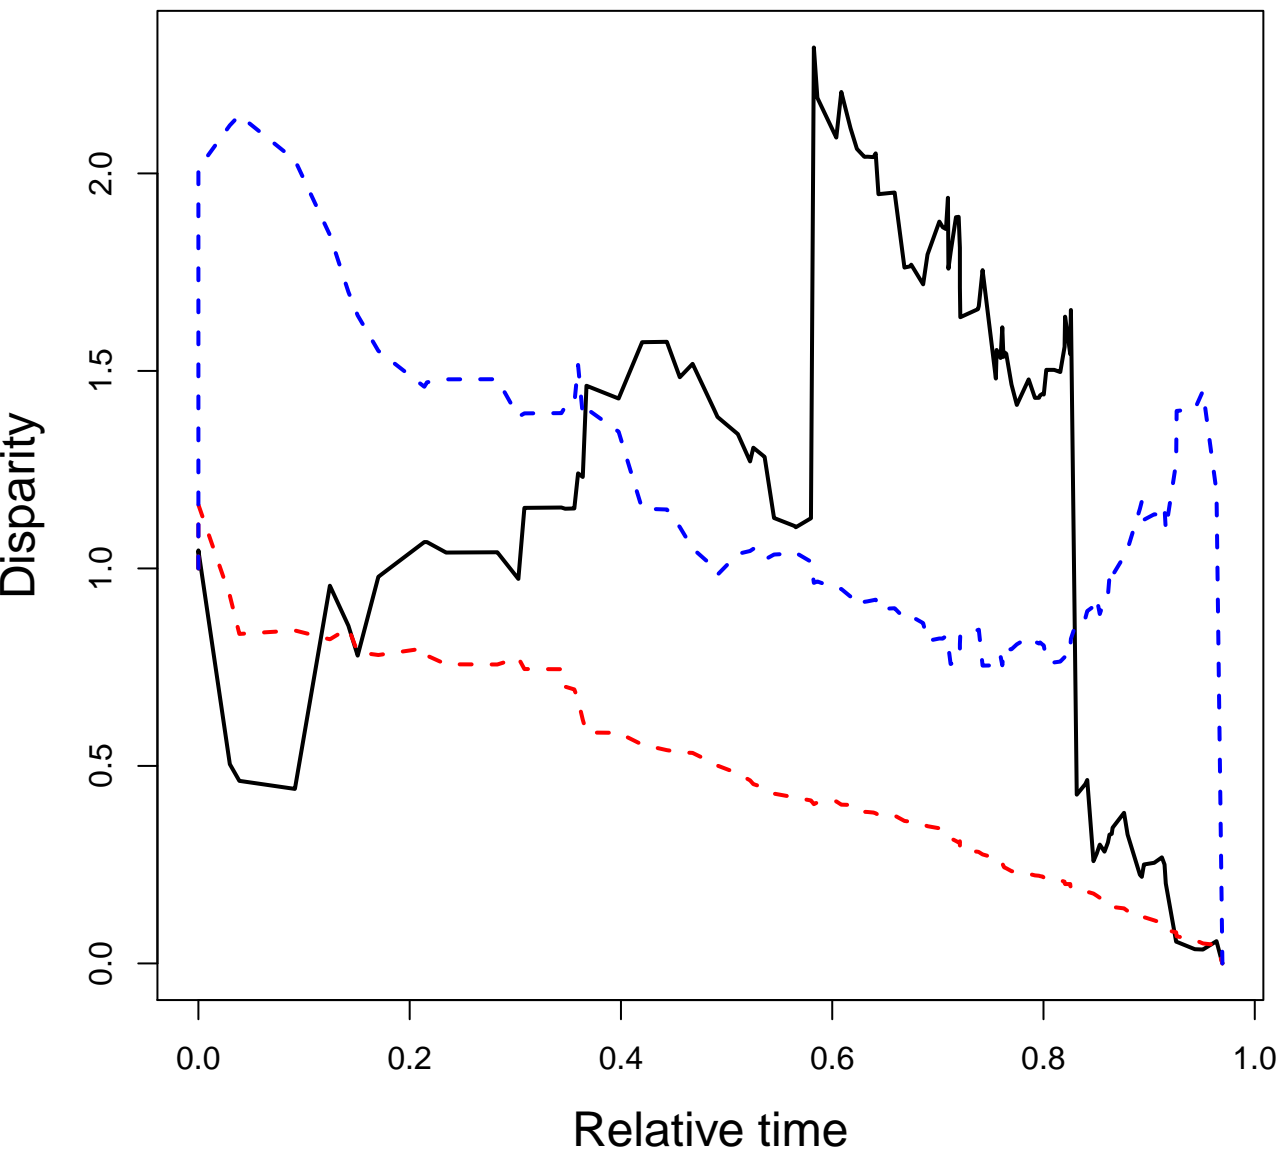

Supplement: pbio.1000620.s001.pdf [file pbio.1000620.s001.pdf]
