# Supplementary material for: Extinction Risk and Diversification Are Linked in a Plant Biodiversity Hotspot
Source: PubMed Central journal article supplement (PMC3101198; doi:10.1371/journal.pbio.1000620), 2011-05-24
Supplement: pbio.1000620.s002.pdf [file pbio.1000620.s002.pdf]

**TABLE S1. IUCN *Red List* data summarized for angiosperm families**

| Taxon             | Number of records | Proportion threatened |
|-------------------|-------------------|-----------------------|
| Acanthaceae       | 88                | 0.77                  |
| Achariaceae       | 17                | 0.76                  |
| Actinidiaceae     | 42                | 0.64                  |
| Adoxaceae         | 12                | 0.75                  |
| Aizoaceae         | 37                | 0.35                  |
| Akaniaceae        | 1                 | 1.00                  |
| Alismataceae      | 1                 | 1.00                  |
| Alliaceae         | 21                | 0.76                  |
| Alstroemeriaceae  | 14                | 0.86                  |
| Altingiaceae      | 1                 | 0.00                  |
| Amaranthaceae     | 31                | 0.81                  |
| Anacardiaceae     | 105               | 0.75                  |
| Ancistrocladaceae | 1                 | 1.00                  |
| Anisophylleaceae  | 17                | 0.76                  |
| Annonaceae        | 227               | 0.73                  |
| Apiaceae          | 24                | 0.75                  |
| Apocynaceae       | 176               | 0.75                  |
| Aquifoliaceae     | 97                | 0.69                  |
| Araceae           | 89                | 0.73                  |
| Araliaceae        | 165               | 0.82                  |
| Arecaceae         | 323               | 0.74                  |
| Argophyllaceae    | 1                 | 0.00                  |
| Aristolochiaceae  | 17                | 1.00                  |

|                    |     |      |
|--------------------|-----|------|
| Asparagaceae       | 29  | 0.52 |
| Asteliaceae        | 1   | 1.00 |
| Asteraceae         | 452 | 0.75 |
| Asteropeiaceae     | 8   | 0.75 |
| Atherospermataceae | 1   | 0.00 |
| Balanopaceae       | 1   | 0.00 |
| Balsaminaceae      | 10  | 0.90 |
| Begoniaceae        | 50  | 0.90 |
| Berberidaceae      | 32  | 0.88 |
| Betulaceae         | 20  | 0.65 |
| Bignoniaceae       | 38  | 0.87 |
| Bixaceae           | 1   | 1.00 |
| Bonnetiaceae       | 13  | 0.92 |
| Boraginaceae       | 66  | 0.73 |
| Brassicaceae       | 42  | 0.88 |
| Bromeliaceae       | 149 | 0.79 |
| Brunelliaceae      | 19  | 0.89 |
| Burmanniaceae      | 4   | 1.00 |
| Burseraceae        | 88  | 0.60 |
| Buxaceae           | 7   | 0.71 |
| Byblidaceae        | 5   | 0.20 |
| Cactaceae          | 147 | 0.77 |
| Calceolariaceae    | 28  | 0.82 |
| Calyceraceae       | 1   | 1.00 |
| Campanulaceae      | 150 | 0.91 |
| Canellaceae        | 6   | 1.00 |
| Cannabaceae        | 7   | 0.57 |

|                   |     |      |
|-------------------|-----|------|
| Caprifoliaceae    | 16  | 0.69 |
| Cardiopteridaceae | 1   | 0.00 |
| Caricaceae        | 7   | 0.71 |
| Caryocaraceae     | 5   | 1.00 |
| Caryophyllaceae   | 32  | 0.81 |
| Casuarinaceae     | 2   | 0.50 |
| Celastraceae      | 86  | 0.72 |
| Cephalotaceae     | 1   | 1.00 |
| Cercidiphyllaceae | 1   | 0.00 |
| Chloranthaceae    | 4   | 1.00 |
| Chrysobalanaceae  | 56  | 0.89 |
| Cistaceae         | 1   | 1.00 |
| Clethraceae       | 7   | 0.43 |
| Clusiaceae        | 132 | 0.69 |
| Colchicaceae      | 1   | 0.00 |
| Combretaceae      | 36  | 0.83 |
| Commelinaceae     | 3   | 1.00 |
| Connaraceae       | 9   | 0.78 |
| Convolvulaceae    | 12  | 0.75 |
| Cornaceae         | 17  | 0.76 |
| Costaceae         | 2   | 1.00 |
| Crassulaceae      | 8   | 0.13 |
| Crypteroniaceae   | 1   | 1.00 |
| Cucurbitaceae     | 5   | 0.80 |
| Cunoniaceae       | 34  | 0.65 |
| Cyclanthaceae     | 20  | 0.80 |
| Cyperaceae        | 18  | 0.83 |

|                  |     |      |
|------------------|-----|------|
| Degeneriaceae    | 2   | 0.50 |
| Didiereaceae     | 1   | 0.00 |
| Dilleniaceae     | 8   | 1.00 |
| Dioscoreaceae    | 5   | 0.60 |
| Dipterocarpaceae | 384 | 0.97 |
| Dirachmaceae     | 2   | 1.00 |
| Droseraceae      | 1   | 1.00 |
| Ebenaceae        | 101 | 0.75 |
| Elaeagnaceae     | 2   | 1.00 |
| Elaeocarpaceae   | 42  | 0.71 |
| Ericaceae        | 28  | 0.68 |
| Eriocaulaceae    | 5   | 0.80 |
| Eucommiaceae     | 1   | 0.00 |
| eudicots         | 1   | 0.00 |
| Euphorbiaceae    | 332 | 0.80 |
| Eupteleaceae     | 1   | 0.00 |
| Fabaceae         | 738 | 0.81 |
| Fagaceae         | 80  | 0.71 |
| Frankeniaceae    | 1   | 1.00 |
| Gentianaceae     | 36  | 0.69 |
| Geraniaceae      | 9   | 1.00 |
| Gesneriaceae     | 92  | 0.85 |
| Gomortegaceae    | 1   | 1.00 |
| Goodeniaceae     | 5   | 0.80 |
| Grossulariaceae  | 5   | 0.80 |
| Gunneraceae      | 1   | 1.00 |
| Hamamelidaceae   | 11  | 0.73 |

|                   |     |      |
|-------------------|-----|------|
| Heliconiaceae     | 16  | 0.94 |
| Hernandiaceae     | 12  | 0.58 |
| Hoplostigmataceae | 1   | 1.00 |
| Huaceae           | 1   | 1.00 |
| Humiriaceae       | 5   | 1.00 |
| Hypericaceae      | 14  | 0.64 |
| Icacinaceae       | 6   | 1.00 |
| Iridaceae         | 6   | 0.17 |
| Irvingiaceae      | 2   | 0.00 |
| Ixonanthaceae     | 2   | 1.00 |
| Juglandaceae      | 20  | 0.70 |
| Juncaceae         | 1   | 0.00 |
| Kirkiaceae        | 1   | 0.00 |
| Lacistemataceae   | 1   | 0.00 |
| Lamiaceae         | 99  | 0.76 |
| Lamiales          | 1   | 0.00 |
| Lauraceae         | 266 | 0.75 |
| Lecythidaceae     | 100 | 0.82 |
| Liliaceae         | 5   | 1.00 |
| Linaceae          | 3   | 1.00 |
| Loasaceae         | 16  | 0.88 |
| Loganiaceae       | 24  | 0.58 |
| Loranthaceae      | 20  | 0.90 |
| Lythraceae        | 12  | 0.75 |
| Maesaceae         | 1   | 1.00 |
| Magnoliaceae      | 60  | 0.93 |
| Malpighiaceae     | 17  | 0.94 |

|                 |     |      |
|-----------------|-----|------|
| Malvaceae       | 201 | 0.86 |
| Marantaceae     | 26  | 0.77 |
| Marcgraviaceae  | 3   | 1.00 |
| Melastomataceae | 318 | 0.85 |
| Meliaceae       | 210 | 0.70 |
| Melianthaceae   | 2   | 1.00 |
| Menispermaceae  | 10  | 0.80 |
| Metteniusaceae  | 4   | 1.00 |
| Molluginaceae   | 1   | 0.00 |
| Monimiaceae     | 15  | 0.80 |
| Moraceae        | 86  | 0.63 |
| Moringaceae     | 1   | 1.00 |
| Myodocarpaceae  | 2   | 1.00 |
| Myricaceae      | 4   | 0.75 |
| Myristicaceae   | 218 | 0.71 |
| Myrsinaceae     | 103 | 0.77 |
| Myrtaceae       | 328 | 0.80 |
| Nepenthaceae    | 77  | 0.66 |
| Nothofagaceae   | 9   | 0.67 |
| Nyctaginaceae   | 14  | 0.64 |
| Ochnaceae       | 24  | 0.75 |
| Olacaceae       | 13  | 0.69 |
| Oleaceae        | 25  | 0.80 |
| Onagraceae      | 12  | 0.67 |
| Opiliaceae      | 2   | 1.00 |
| Orchidaceae     | 150 | 0.97 |
| Orobanchaceae   | 7   | 0.57 |

|                    |     |      |
|--------------------|-----|------|
| Oxalidaceae        | 11  | 0.55 |
| Pandanaceae        | 25  | 0.88 |
| Passifloraceae     | 29  | 0.76 |
| Paulowniaceae      | 1   | 1.00 |
| Pedaliaceae        | 1   | 0.00 |
| Pennantiaceae      | 1   | 1.00 |
| Pentaphragmataceae | 67  | 0.82 |
| Peridiscaceae      | 1   | 1.00 |
| Phyllanthaceae     | 91  | 0.76 |
| Picramniaceae      | 2   | 1.00 |
| Picrodendraceae    | 4   | 0.75 |
| Piperaceae         | 110 | 0.92 |
| Pittosporaceae     | 32  | 0.78 |
| Plantaginaceae     | 6   | 0.50 |
| Plumbaginaceae     | 6   | 0.50 |
| Poaceae            | 66  | 0.65 |
| Podostemaceae      | 6   | 1.00 |
| Polemoniaceae      | 2   | 1.00 |
| Polygalaceae       | 17  | 0.82 |
| Polygonaceae       | 21  | 0.86 |
| Portulacaceae      | 4   | 0.75 |
| Proteaceae         | 49  | 0.80 |
| Putranjivaceae     | 26  | 0.92 |
| Ranunculaceae      | 6   | 0.83 |
| Resedaceae         | 2   | 0.00 |
| Rhamnaceae         | 31  | 0.77 |
| Rhizophoraceae     | 26  | 0.85 |

|                  |     |      |
|------------------|-----|------|
| Rhynchoalycaceae | 1   | 1.00 |
| Rosaceae         | 106 | 0.75 |
| Rubiaceae        | 430 | 0.87 |
| Rutaceae         | 129 | 0.87 |
| Sabiaceae        | 4   | 1.00 |
| Salicaceae       | 95  | 0.83 |
| Salvadoraceae    | 1   | 0.00 |
| Santalaceae      | 8   | 0.75 |
| Sapindaceae      | 124 | 0.85 |
| Sapotaceae       | 325 | 0.75 |
| Sarcolaenaceae   | 16  | 0.63 |
| Sarraceniaceae   | 7   | 0.29 |
| Schisandraceae   | 4   | 0.50 |
| Schlegeliaceae   | 1   | 1.00 |
| Scrophulariaceae | 17  | 0.59 |
| Simaroubaceae    | 10  | 0.80 |
| Siparunaceae     | 8   | 0.88 |
| Solanaceae       | 73  | 0.67 |
| Staphyleaceae    | 1   | 1.00 |
| Stemonuraceae    | 3   | 1.00 |
| Stilbaceae       | 1   | 0.00 |
| Styracaceae      | 19  | 0.89 |
| Surianaceae      | 1   | 1.00 |
| Symplocaceae     | 39  | 0.92 |
| Tamaricaceae     | 1   | 0.00 |
| Tapisciaceae     | 3   | 0.67 |
| Tetramelaceae    | 2   | 0.00 |



|                  |    |      |
|------------------|----|------|
| Theaceae         | 24 | 0.96 |
| Theophrastaceae  | 6  | 0.83 |
| Thymelaeaceae    | 37 | 0.84 |
| Ticodendraceae   | 1  | 1.00 |
| Toricelliaceae   | 7  | 0.57 |
| Triuridaceae     | 1  | 1.00 |
| Tropaeolaceae    | 8  | 1.00 |
| Ulmaceae         | 9  | 0.78 |
| Urticaceae       | 22 | 0.68 |
| Verbenaceae      | 21 | 0.81 |
| Violaceae        | 32 | 0.78 |
| Vitaceae         | 7  | 0.00 |
| Vochysiaceae     | 4  | 1.00 |
| Winteraceae      | 5  | 1.00 |
| Xanthorrhoeaceae | 25 | 0.48 |
| Xyridaceae       | 1  | 1.00 |
| Zingiberaceae    | 4  | 0.25 |
| Zygophyllaceae   | 9  | 0.56 |
