# Supplementary material for: Extinction Risk and Diversification Are Linked in a Plant Biodiversity Hotspot
Source: PubMed Central journal article supplement (PMC3101198; doi:10.1371/journal.pbio.1000620), 2011-05-24
Supplement: pbio.1000620.s003.pdf [file pbio.1000620.s003.pdf]

**TABLE S2. IUCN *Red List* data summarized for angiosperm orders**

| Taxon            | Number of records | Proportion threatened |
|------------------|-------------------|-----------------------|
| Alismatales      | 90                | 0.73                  |
| Apiales          | 231               | 0.80                  |
| Aquifoliales     | 101               | 0.69                  |
| Arecales         | 323               | 0.74                  |
| Asparagales      | 232               | 0.82                  |
| Asterales        | 609               | 0.79                  |
| Austrobaileyales | 4                 | 0.50                  |
| Brassicales      | 54                | 0.81                  |
| Canellales       | 11                | 1.00                  |
| Caryophyllales   | 383               | 0.70                  |
| Celastrales      | 86                | 0.72                  |
| Commelinales     | 3                 | 1.00                  |
| Cornales         | 33                | 0.82                  |
| Crossosomatales  | 1                 | 1.00                  |
| Cucurbitales     | 74                | 0.84                  |
| Dioscoreales     | 9                 | 0.78                  |
| Dipsacales       | 28                | 0.71                  |
| Ericales         | 884               | 0.77                  |
| Fabales          | 756               | 0.81                  |
| Fagales          | 136               | 0.70                  |
| Garryales        | 1                 | 0.00                  |
| Gentianales      | 666               | 0.82                  |
| Geraniales       | 11                | 1.00                  |

|              |     |      |
|--------------|-----|------|
| Gunnerales   | 1   | 1.00 |
| Lamiales     | 431 | 0.77 |
| Laurales     | 303 | 0.75 |
| Liliales     | 20  | 0.85 |
| Magnoliales  | 507 | 0.74 |
| Malpighiales | 934 | 0.79 |
| Malvales     | 648 | 0.92 |
| Myrtales     | 712 | 0.82 |
| Oxalidales   | 97  | 0.68 |
| Pandanales   | 46  | 0.85 |
| Piperales    | 127 | 0.93 |
| Poales       | 240 | 0.75 |
| Proteales    | 49  | 0.80 |
| Ranunculales | 49  | 0.84 |
| Rosales      | 265 | 0.71 |
| Santalales   | 43  | 0.81 |
| Sapindales   | 667 | 0.76 |
| Saxifragales | 26  | 0.50 |
| Solanales    | 85  | 0.68 |
| Zingiberales | 48  | 0.79 |
