# Supplementary material for: Extinction Risk and Diversification Are Linked in a Plant Biodiversity Hotspot
Source: PubMed Central journal article supplement (PMC3101198; doi:10.1371/journal.pbio.1000620), 2011-05-24
Supplement: pbio.1000620.s004.pdf [file pbio.1000620.s004.pdf]

**TABLE S3. South African families**

| Taxon              | number of records | proportion threatened | p-value |
|--------------------|-------------------|-----------------------|---------|
| Acanthaceae        | 266               | 0.05                  | 0.00    |
| Achariaceae        | 6                 | 0.00                  | 0.39    |
| Actiniopteridaceae | 2                 | 0.00                  | 0.69    |
| Adiantaceae        | 46                | 0.02                  | 0.01    |
| Aizoaceae          | 1420              | 0.18                  | 0.01    |
| Alismataceae       | 2                 | 0.00                  | 0.71    |
| Alliaceae          | 254               | 0.30                  | 0.00    |
| Amaranthaceae      | 132               | 0.01                  | 0.00    |
| Anacardiaceae      | 104               | 0.10                  | 0.09    |
| Annonaceae         | 11                | 0.00                  | 0.14    |
| Aphloiaceae        | 1                 | 0.00                  | 0.87    |
| Apiaceae           | 201               | 0.12                  | 0.23    |
| Apocynaceae        | 647               | 0.17                  | 0.34    |
| Aponogetonaceae    | 9                 | 0.33                  | 0.22    |
| Aquifoliaceae      | 1                 | 0.00                  | 0.83    |
| Araceae            | 21                | 0.14                  | 0.92    |
| Araliaceae         | 16                | 0.00                  | 0.06    |
| Arecaceae          | 6                 | 0.33                  | 0.28    |
| Asparagaceae       | 657               | 0.17                  | 0.35    |
| Aspleniaceae       | 39                | 0.00                  | 0.00    |
| Asteraceae         | 2082              | 0.10                  | 0.00    |
| Azollaceae         | 1                 | 0.00                  | 0.85    |
| Balanophoraceae    | 2                 | 0.00                  | 0.70    |
| Balsaminaceae      | 3                 | 0.33                  | 0.45    |

|                  |     |      |      |
|------------------|-----|------|------|
| Begoniaceae      | 5   | 0.40 | 0.21 |
| Bignoniaceae     | 10  | 0.10 | 0.68 |
| Blechnaceae      | 10  | 0.00 | 0.19 |
| Boraginaceae     | 83  | 0.16 | 1.00 |
| Brassicaceae     | 166 | 0.06 | 0.00 |
| Bruniaceae       | 70  | 0.29 | 0.00 |
| Burmanniaceae    | 1   | 0.00 | 0.84 |
| Burseraceae      | 18  | 0.00 | 0.04 |
| Buxaceae         | 2   | 0.00 | 0.73 |
| Cactaceae        | 1   | 0.00 | 0.85 |
| Campanulaceae    | 338 | 0.10 | 0.00 |
| Canellaceae      | 1   | 1.00 | 0.15 |
| Cannabaceae      | 5   | 0.00 | 0.41 |
| Caprifoliaceae   | 24  | 0.13 | 0.70 |
| Caryophyllaceae  | 44  | 0.02 | 0.00 |
| Celastraceae     | 86  | 0.12 | 0.31 |
| Ceratophyllaceae | 3   | 0.00 | 0.59 |
| Chrysobalanaceae | 5   | 0.00 | 0.42 |
| Clusiaceae       | 2   | 0.00 | 0.71 |
| Colchicaceae     | 85  | 0.11 | 0.20 |
| Combretaceae     | 32  | 0.03 | 0.03 |
| Commelinaceae    | 34  | 0.06 | 0.10 |
| Connaraceae      | 1   | 0.00 | 0.83 |
| Convolvulaceae   | 85  | 0.00 | 0.00 |
| Crassulaceae     | 330 | 0.08 | 0.00 |
| Cucurbitaceae    | 65  | 0.05 | 0.01 |
| Cunoniaceae      | 2   | 0.00 | 0.69 |

|                  |      |      |      |
|------------------|------|------|------|
| Cupressaceae     | 3    | 0.67 | 0.07 |
| Curtisiaceae     | 1    | 1.00 | 0.15 |
| Cyatheaceae      | 2    | 0.00 | 0.69 |
| Cymodoceaceae    | 2    | 0.00 | 0.70 |
| Cyperaceae       | 427  | 0.05 | 0.00 |
| Cytinaceae       | 3    | 0.33 | 0.46 |
| Davalliaceae     | 2    | 0.00 | 0.73 |
| Dennstaedtiaceae | 8    | 0.00 | 0.26 |
| Dioscoreaceae    | 13   | 0.31 | 0.15 |
| Droseraceae      | 20   | 0.00 | 0.04 |
| Dryopteridaceae  | 21   | 0.00 | 0.03 |
| Ebenaceae        | 52   | 0.00 | 0.00 |
| Elatinaceae      | 9    | 0.00 | 0.20 |
| Equisetaceae     | 1    | 0.00 | 0.86 |
| Ericaceae        | 804  | 0.24 | 0.00 |
| Eriocaulaceae    | 11   | 0.00 | 0.16 |
| eudicots         | 13   | 0.00 | 0.10 |
| Euphorbiaceae    | 367  | 0.07 | 0.00 |
| Fabaceae         | 1578 | 0.19 | 0.00 |
| Flagellariaceae  | 1    | 0.00 | 0.82 |
| Frankeniaceae    | 2    | 0.00 | 0.71 |
| Geissolomataceae | 1    | 0.00 | 0.83 |
| Gentianaceae     | 79   | 0.04 | 0.00 |
| Geraniaceae      | 289  | 0.10 | 0.00 |
| Gesneriaceae     | 63   | 0.25 | 0.03 |
| Gisekiaceae      | 3    | 0.00 | 0.58 |
| Gleicheniaceae   | 3    | 0.00 | 0.58 |

|                  |      |      |      |
|------------------|------|------|------|
| Goodeniaceae     | 2    | 0.00 | 0.71 |
| Grammitidaceae   | 1    | 0.00 | 0.84 |
| Grubbiaceae      | 6    | 0.00 | 0.36 |
| Gunneraceae      | 1    | 0.00 | 0.85 |
| Haemodoraceae    | 9    | 0.11 | 0.84 |
| Haloragaceae     | 1    | 0.00 | 0.85 |
| Hamamelidaceae   | 3    | 0.00 | 0.61 |
| Hernandiaceae    | 1    | 0.00 | 0.83 |
| Hydnoraceae      | 3    | 0.00 | 0.60 |
| Hydrocharitaceae | 10   | 0.00 | 0.19 |
| Hydrostachyaceae | 1    | 1.00 | 0.15 |
| Hymenophyllaceae | 11   | 0.00 | 0.17 |
| Hypericaceae     | 7    | 0.00 | 0.32 |
| Hypoxidaceae     | 79   | 0.13 | 0.44 |
| Icacinaceae      | 8    | 0.13 | 0.89 |
| Iridaceae        | 1132 | 0.30 | 0.00 |
| Isoetaceae       | 9    | 0.78 | 0.00 |
| Iteaceae         | 1    | 0.00 | 0.85 |
| Juncaceae        | 16   | 0.00 | 0.05 |
| Juncaginaceae    | 2    | 0.00 | 0.70 |
| Kirkiaceae       | 2    | 0.00 | 0.70 |
| Lamiaceae        | 257  | 0.06 | 0.00 |
| Lamiales         | 10   | 0.00 | 0.17 |
| Lanariaceae      | 1    | 0.00 | 0.85 |
| Lauraceae        | 12   | 0.50 | 0.01 |
| Lentibulariaceae | 18   | 0.00 | 0.05 |
| Linaceae         | 15   | 0.00 | 0.07 |

|                  |     |      |      |
|------------------|-----|------|------|
| Loasaceae        | 1   | 0.00 | 0.85 |
| Loganiaceae      | 10  | 0.00 | 0.17 |
| Lomariopsidaceae | 9   | 0.00 | 0.21 |
| Loranthaceae     | 48  | 0.00 | 0.00 |
| Lycopodiaceae    | 10  | 0.00 | 0.19 |
| Lythraceae       | 26  | 0.04 | 0.09 |
| Maesaceae        | 2   | 0.00 | 0.72 |
| Malpighiaceae    | 7   | 0.00 | 0.31 |
| Malvaceae        | 323 | 0.04 | 0.00 |
| Marattiaceae     | 1   | 0.00 | 0.85 |
| Marsileaceae     | 14  | 0.14 | 0.94 |
| Melastomataceae  | 9   | 0.00 | 0.23 |
| Meliaceae        | 13  | 0.15 | 0.95 |
| Melianthaceae    | 14  | 0.00 | 0.08 |
| Menispermaceae   | 13  | 0.00 | 0.11 |
| Menyanthaceae    | 6   | 0.17 | 0.89 |
| Molluginaceae    | 97  | 0.05 | 0.00 |
| Monimiaceae      | 1   | 0.00 | 0.84 |
| Montiniaceae     | 1   | 0.00 | 0.81 |
| Moraceae         | 30  | 0.00 | 0.01 |
| Musaceae         | 1   | 0.00 | 0.85 |
| Myricaceae       | 10  | 0.10 | 0.72 |
| Myrsinaceae      | 9   | 0.11 | 0.82 |
| Myrtaceae        | 24  | 0.21 | 0.52 |
| Neuradaceae      | 7   | 0.00 | 0.30 |
| Nyctaginaceae    | 11  | 0.00 | 0.15 |
| Nymphaeaceae     | 4   | 0.00 | 0.51 |

|                 |     |      |      |
|-----------------|-----|------|------|
| Ochnaceae       | 13  | 0.08 | 0.49 |
| Olacaceae       | 4   | 0.00 | 0.51 |
| Oleaceae        | 26  | 0.00 | 0.01 |
| Oleandraceae    | 3   | 0.00 | 0.59 |
| Oliniaceae      | 6   | 0.00 | 0.36 |
| Onagraceae      | 8   | 0.00 | 0.25 |
| Ophioglossaceae | 14  | 0.07 | 0.43 |
| Orchidaceae     | 474 | 0.18 | 0.10 |
| Orobanchaceae   | 61  | 0.07 | 0.02 |
| Osmundaceae     | 2   | 0.00 | 0.74 |
| Oxalidaceae     | 185 | 0.19 | 0.20 |
| Papaveraceae    | 7   | 0.00 | 0.31 |
| Parkeriaceae    | 1   | 0.00 | 0.82 |
| Passifloraceae  | 25  | 0.16 | 0.92 |
| Pedaliaceae     | 18  | 0.00 | 0.06 |
| Penaeeae        | 27  | 0.30 | 0.07 |
| Phrymaceae      | 1   | 0.00 | 0.84 |
| Phyllanthaceae  | 37  | 0.03 | 0.02 |
| Phytolaccaceae  | 6   | 0.00 | 0.36 |
| Picrodendraceae | 2   | 0.00 | 0.69 |
| Piperaceae      | 6   | 0.00 | 0.37 |
| Pittosporaceae  | 1   | 0.00 | 0.85 |
| Plantaginaceae  | 20  | 0.00 | 0.03 |
| Plumbaginaceae  | 20  | 0.25 | 0.29 |
| Poaceae         | 739 | 0.04 | 0.00 |
| Podocarpaceae   | 4   | 0.00 | 0.49 |
| Podostemaceae   | 2   | 0.00 | 0.70 |

|                  |     |      |      |
|------------------|-----|------|------|
| Polygalaceae     | 188 | 0.19 | 0.32 |
| Polygonaceae     | 33  | 0.03 | 0.04 |
| Polypodiaceae    | 14  | 0.00 | 0.10 |
| Pontederiaceae   | 2   | 0.00 | 0.70 |
| Portulacaceae    | 52  | 0.08 | 0.09 |
| Potamogetonaceae | 10  | 0.10 | 0.68 |
| Proteaceae       | 377 | 0.68 | 0.00 |
| Psilotaceae      | 1   | 0.00 | 0.83 |
| Pteridaceae      | 8   | 0.00 | 0.25 |
| Putranjavaceae   | 6   | 0.00 | 0.36 |
| Ranunculaceae    | 26  | 0.12 | 0.57 |
| Resedaceae       | 3   | 0.00 | 0.59 |
| Restionaceae     | 333 | 0.18 | 0.27 |
| Rhamnaceae       | 178 | 0.21 | 0.08 |
| Rhizophoraceae   | 13  | 0.15 | 0.94 |
| Rhynchoalycaceae | 1   | 1.00 | 0.17 |
| Roridulaceae     | 2   | 0.00 | 0.72 |
| Rosaceae         | 160 | 0.20 | 0.12 |
| Rubiaceae        | 241 | 0.04 | 0.00 |
| Ruppiaceae       | 2   | 0.00 | 0.71 |
| Rutaceae         | 300 | 0.36 | 0.00 |
| Salicaceae       | 23  | 0.04 | 0.14 |
| Salvadoraceae    | 4   | 0.00 | 0.49 |
| Santalaceae      | 133 | 0.05 | 0.00 |
| Sapindaceae      | 25  | 0.04 | 0.11 |
| Sapotaceae       | 15  | 0.07 | 0.35 |
| Schizaeaceae     | 11  | 0.00 | 0.17 |

|                  |     |      |      |
|------------------|-----|------|------|
| Scrophulariaceae | 713 | 0.10 | 0.00 |
| Selaginellaceae  | 6   | 0.00 | 0.35 |
| Smilacaceae      | 1   | 0.00 | 0.83 |
| Solanaceae       | 52  | 0.02 | 0.00 |
| Stangeriaceae    | 1   | 1.00 | 0.15 |
| Stilbaceae       | 26  | 0.15 | 0.99 |
| Strelitziaceae   | 6   | 0.17 | 0.85 |
| Tamaricaceae     | 1   | 0.00 | 0.83 |
| Tecophilaeaceae  | 9   | 0.11 | 0.80 |
| Thelypteridaceae | 14  | 0.07 | 0.39 |
| Theophrastaceae  | 2   | 0.00 | 0.71 |
| Thurniaceae      | 1   | 0.00 | 0.81 |
| Thymelaeaceae    | 180 | 0.17 | 0.63 |
| Typhaceae        | 1   | 0.00 | 0.84 |
| Urticaceae       | 20  | 0.00 | 0.03 |
| Vahliaceae       | 5   | 0.00 | 0.43 |
| Velloziaceae     | 9   | 0.00 | 0.24 |
| Verbenaceae      | 30  | 0.00 | 0.00 |
| Violaceae        | 8   | 0.00 | 0.24 |
| Vitaceae         | 47  | 0.04 | 0.02 |
| Vittariaceae     | 1   | 0.00 | 0.85 |
| Woodsiaceae      | 7   | 0.14 | 0.98 |
| Xanthorrhoeaceae | 512 | 0.26 | 0.00 |
| Xyridaceae       | 8   | 0.00 | 0.27 |
| Zamiaceae        | 37  | 0.89 | 0.00 |
| Zingiberaceae    | 1   | 1.00 | 0.16 |
| Zosteraceae      | 1   | 0.00 | 0.86 |



Zygophyllaceae

50

0.04

0.01
