# Supplementary material for: Extinction Risk and Diversification Are Linked in a Plant Biodiversity Hotspot
Source: PubMed Central journal article supplement (PMC3101198; doi:10.1371/journal.pbio.1000620), 2011-05-24
Supplement: pbio.1000620.s005.pdf [file pbio.1000620.s005.pdf]

**TABLE S4. South African orders**

| Taxon           | number of records | proportion threatened | p-value |
|-----------------|-------------------|-----------------------|---------|
| Alismatales     | 59                | 0.12                  | 0.43    |
| Apiales         | 218               | 0.11                  | 0.07    |
| Aquifoliales    | 1                 | 0.00                  | 0.85    |
| Arecales        | 6                 | 0.33                  | 0.31    |
| Asparagales     | 3118              | 0.24                  | 0.00    |
| Asterales       | 2428              | 0.10                  | 0.00    |
| Brassicales     | 173               | 0.06                  | 0.00    |
| Canellales      | 1                 | 1.00                  | 0.16    |
| Caryophyllales  | 1842              | 0.15                  | 0.49    |
| Celastrales     | 86                | 0.12                  | 0.29    |
| Ceratophyllales | 3                 | 0.00                  | 0.61    |
| Commelinales    | 45                | 0.07                  | 0.09    |
| Cornales        | 9                 | 0.22                  | 0.62    |
| Cucurbitales    | 70                | 0.07                  | 0.03    |
| Dioscoreales    | 14                | 0.29                  | 0.20    |
| Dipsacales      | 24                | 0.13                  | 0.73    |
| Ericales        | 892               | 0.22                  | 0.00    |
| Fabales         | 1766              | 0.19                  | 0.00    |
| Fagales         | 10                | 0.10                  | 0.70    |
| Gentianales     | 977               | 0.12                  | 0.00    |
| Geraniales      | 303               | 0.09                  | 0.00    |
| Gunnerales      | 1                 | 0.00                  | 0.84    |
| Lamiales        | 1519              | 0.08                  | 0.00    |
| Laurales        | 14                | 0.43                  | 0.02    |

|              |      |      |      |
|--------------|------|------|------|
| Liliales     | 86   | 0.10 | 0.19 |
| Magnoliales  | 11   | 0.00 | 0.14 |
| Malpighiales | 547  | 0.06 | 0.00 |
| Malvales     | 510  | 0.08 | 0.00 |
| Myrtales     | 133  | 0.12 | 0.22 |
| Oxalidales   | 188  | 0.19 | 0.26 |
| Pandanales   | 9    | 0.00 | 0.22 |
| Piperales    | 9    | 0.00 | 0.22 |
| Poales       | 1537 | 0.07 | 0.00 |
| Proteales    | 377  | 0.68 | 0.00 |
| Ranunculales | 46   | 0.07 | 0.08 |
| Rosales      | 393  | 0.18 | 0.32 |
| Santalales   | 185  | 0.04 | 0.00 |
| Sapindales   | 462  | 0.26 | 0.00 |
| Saxifragales | 335  | 0.08 | 0.00 |
| Solanales    | 138  | 0.01 | 0.00 |
| Zingiberales | 8    | 0.25 | 0.48 |
