# Supplementary material for: Extinction Risk and Diversification Are Linked in a Plant Biodiversity Hotspot
Source: PubMed Central journal article supplement (PMC3101198; doi:10.1371/journal.pbio.1000620), 2011-05-24
Supplement: pbio.1000620.s006.pdf [file pbio.1000620.s006.pdf]

**TABLE S5. South African APG taxonomic class 4**

| Taxon          | number of records | proportion threatened | p-value |
|----------------|-------------------|-----------------------|---------|
| asterids       | 901               | 0.22                  | 0.00    |
| Caryophyllales | 1842              | 0.15                  | 0.50    |
| commelinids    | 1596              | 0.08                  | 0.00    |
| euasterids_I   | 2730              | 0.10                  | 0.00    |
| euasterids_II  | 2741              | 0.11                  | 0.00    |
| eurosids_I     | 3110              | 0.16                  | 0.92    |
| eurosids_II    | 1145              | 0.15                  | 0.69    |
| magnoliids     | 35                | 0.20                  | 0.51    |
| noncommelinids | 3286              | 0.24                  | 0.00    |
| rosids         | 485               | 0.09                  | 0.00    |
| Santalales     | 185               | 0.04                  | 0.00    |
| Saxifragales   | 335               | 0.08                  | 0.00    |
