# Supplementary material for: Extinction Risk and Diversification Are Linked in a Plant Biodiversity Hotspot
Source: PubMed Central journal article supplement (PMC3101198; doi:10.1371/journal.pbio.1000620), 2011-05-24
Supplement: pbio.1000620.s007.pdf [file pbio.1000620.s007.pdf]

**TABLE S6. South African APG taxonomic class 5**

| Taxon        | number of records | proportion threatened | p-value |
|--------------|-------------------|-----------------------|---------|
| asterids     | 6372              | 0.12                  | 0.00    |
| coreeudicots | 2363              | 0.13                  | 0.00    |
| eudicots     | 438               | 0.59                  | 0.00    |
| magnoliids   | 35                | 0.20                  | 0.47    |
| monocots     | 4882              | 0.18                  | 0.00    |
| rosids       | 4740              | 0.15                  | 0.12    |
