# Supplementary material for: Extinction Risk and Diversification Are Linked in a Plant Biodiversity Hotspot
Source: PubMed Central journal article supplement (PMC3101198; doi:10.1371/journal.pbio.1000620), 2011-05-24
Supplement: pbio.1000620.s008.pdf [file pbio.1000620.s008.pdf]

**TABLE S7. UK families**

| Taxon            | number of records | proportion threatened | p-value |
|------------------|-------------------|-----------------------|---------|
| Zosteraceae      | 2                 | 0.500                 | 0.428   |
| Violaceae        | 20                | 0.200                 | 0.500   |
| Verbenaceae      | 1                 | 0.000                 | 0.791   |
| Urticaceae       | 4                 | 0.000                 | 0.330   |
| Ulmaceae         | 3                 | 0.000                 | 0.424   |
| Typhaceae        | 6                 | 0.000                 | 0.179   |
| Tofieldiaceae    | 1                 | 0.000                 | 0.760   |
| Thymelaeaceae    | 2                 | 0.500                 | 0.396   |
| Theophrastaceae  | 1                 | 0.000                 | 0.763   |
| Solanaceae       | 4                 | 0.250                 | 0.649   |
| Scrophulariaceae | 8                 | 0.000                 | 0.110   |
| Scheuchzeriaceae | 1                 | 0.000                 | 0.768   |
| Saxifragaceae    | 14                | 0.357                 | 0.214   |
| Sapindaceae      | 1                 | 0.000                 | 0.757   |
| Santalaceae      | 1                 | 0.000                 | 0.754   |
| Salicaceae       | 24                | 0.125                 | 0.146   |
| Ruppiaceae       | 2                 | 0.000                 | 0.609   |
| Rubiaceae        | 20                | 0.150                 | 0.287   |
| Rosaceae         | 104               | 0.327                 | 0.016   |
| Rhamnaceae       | 2                 | 0.000                 | 0.590   |
| Resedaceae       | 2                 | 0.000                 | 0.570   |
| Ranunculaceae    | 42                | 0.167                 | 0.209   |
| Primulaceae      | 6                 | 0.167                 | 0.563   |
| Potamogetonaceae | 33                | 0.455                 | 0.010   |

|                  |     |       |       |
|------------------|-----|-------|-------|
| Portulacaceae    | 3   | 0.000 | 0.467 |
| Polygonaceae     | 39  | 0.154 | 0.152 |
| Polygalaceae     | 4   | 0.000 | 0.343 |
| Polemoniaceae    | 1   | 0.000 | 0.775 |
| Poaceae          | 138 | 0.094 | 0.000 |
| Plumbaginaceae   | 8   | 0.250 | 0.615 |
| Plantaginaceae   | 46  | 0.087 | 0.005 |
| Parnassiaceae    | 1   | 0.000 | 0.771 |
| Papaveraceae     | 26  | 0.154 | 0.278 |
| Oxalidaceae      | 1   | 0.000 | 0.786 |
| Orobanchaceae    | 37  | 0.351 | 0.066 |
| Orchidaceae      | 52  | 0.404 | 0.004 |
| Onagraceae       | 14  | 0.000 | 0.019 |
| Oleaceae         | 2   | 0.000 | 0.588 |
| Nymphaeaceae     | 3   | 0.000 | 0.456 |
| Nartheceae       | 1   | 0.000 | 0.776 |
| Myrsinaceae      | 11  | 0.000 | 0.048 |
| Myricaceae       | 1   | 0.000 | 0.759 |
| Molluginaceae    | 1   | 1.000 | 0.257 |
| Menyanthaceae    | 2   | 0.000 | 0.608 |
| Melanthiaceae    | 1   | 0.000 | 0.741 |
| Malvaceae        | 7   | 0.000 | 0.153 |
| Lythraceae       | 3   | 0.333 | 0.518 |
| Loranthaceae     | 1   | 0.000 | 0.769 |
| Linaceae         | 5   | 0.000 | 0.260 |
| Liliaceae        | 4   | 0.750 | 0.030 |
| Lentibulariaceae | 8   | 0.125 | 0.406 |

|                  |     |       |       |
|------------------|-----|-------|-------|
| Lamiaceae        | 48  | 0.313 | 0.135 |
| Juncaginaceae    | 2   | 0.000 | 0.584 |
| Juncaceae        | 35  | 0.143 | 0.129 |
| Iridaceae        | 4   | 0.250 | 0.627 |
| Hypericaceae     | 12  | 0.000 | 0.046 |
| Hydrocharitaceae | 5   | 0.600 | 0.064 |
| Haloragaceae     | 3   | 0.333 | 0.514 |
| Grossulariaceae  | 3   | 0.000 | 0.456 |
| Geraniaceae      | 15  | 0.000 | 0.015 |
| Gentianaceae     | 17  | 0.412 | 0.071 |
| Frankeniaceae    | 1   | 0.000 | 0.757 |
| Fagaceae         | 4   | 0.000 | 0.358 |
| Fabaceae         | 77  | 0.117 | 0.010 |
| Euphorbiaceae    | 13  | 0.154 | 0.345 |
| Eriocaulaceae    | 1   | 0.000 | 0.787 |
| Ericaceae        | 27  | 0.222 | 0.553 |
| Elatinaceae      | 2   | 0.000 | 0.597 |
| Elaeagnaceae     | 1   | 0.000 | 0.786 |
| Droseraceae      | 4   | 0.250 | 0.645 |
| Dioscoreaceae    | 1   | 0.000 | 0.777 |
| Diapensiaceae    | 1   | 1.000 | 0.232 |
| Cyperaceae       | 131 | 0.290 | 0.071 |
| Cucurbitaceae    | 1   | 0.000 | 0.755 |
| Crassulaceae     | 10  | 0.100 | 0.298 |
| Cornaceae        | 2   | 0.000 | 0.597 |
| Convolvulaceae   | 7   | 0.143 | 0.454 |
| Colchicaceae     | 1   | 0.000 | 0.770 |

|                  |     |       |       |
|------------------|-----|-------|-------|
| Cistaceae        | 6   | 0.333 | 0.411 |
| Ceratophyllaceae | 2   | 0.000 | 0.609 |
| Celastraceae     | 1   | 0.000 | 0.767 |
| Caryophyllaceae  | 76  | 0.355 | 0.006 |
| Caprifoliaceae   | 14  | 0.143 | 0.344 |
| Cannabaceae      | 1   | 0.000 | 0.769 |
| Campanulaceae    | 13  | 0.308 | 0.326 |
| Butomaceae       | 1   | 0.000 | 0.765 |
| Brassicaceae     | 69  | 0.130 | 0.030 |
| Boraginaceae     | 21  | 0.143 | 0.227 |
| Betulaceae       | 6   | 0.000 | 0.188 |
| Berberidaceae    | 1   | 0.000 | 0.770 |
| Balsaminaceae    | 1   | 0.000 | 0.762 |
| Asteraceae       | 535 | 0.303 | 0.000 |
| Asparagaceae     | 13  | 0.308 | 0.321 |
| Araliaceae       | 4   | 0.000 | 0.360 |
| Araceae          | 7   | 0.143 | 0.500 |
| Aquifoliaceae    | 1   | 0.000 | 0.778 |
| Apocynaceae      | 1   | 0.000 | 0.770 |
| Apiaceae         | 60  | 0.217 | 0.466 |
| Amaranthaceae    | 30  | 0.233 | 0.587 |
| Alliaceae        | 9   | 0.222 | 0.652 |
| Alismataceae     | 8   | 0.250 | 0.591 |
| Adoxaceae        | 5   | 0.000 | 0.280 |
