# Supplementary material for: Extinction Risk and Diversification Are Linked in a Plant Biodiversity Hotspot
Source: PubMed Central journal article supplement (PMC3101198; doi:10.1371/journal.pbio.1000620), 2011-05-24
Supplement: pbio.1000620.s009.pdf [file pbio.1000620.s009.pdf]

**TABLE S8. UK orders**

| Taxon        | number of records | proportion threatened | p-value |
|--------------|-------------------|-----------------------|---------|
| Solanales    | 11                | 0.182                 | 0.486   |
| Saxifragales | 30                | 0.233                 | 0.561   |
| Sapindales   | 1                 | 0.000                 | 0.757   |
| Santalales   | 2                 | 0.000                 | 0.583   |
| Rosales      | 115               | 0.296                 | 0.071   |
| Ranunculales | 69                | 0.159                 | 0.105   |
| Poales       | 311               | 0.180                 | 0.011   |
| Oxalidales   | 1                 | 0.000                 | 0.786   |
| Myrtales     | 17                | 0.059                 | 0.070   |
| Malvales     | 15                | 0.200                 | 0.533   |
| Malpighiales | 76                | 0.118                 | 0.008   |
| Liliales     | 6                 | 0.500                 | 0.136   |
| Lamiales     | 150               | 0.220                 | 0.381   |
| Geraniales   | 15                | 0.000                 | 0.015   |
| Gentianales  | 38                | 0.263                 | 0.390   |
| Fagales      | 11                | 0.000                 | 0.048   |
| Fabales      | 81                | 0.111                 | 0.008   |
| euasterids I | 21                | 0.143                 | 0.227   |
| Ericales     | 48                | 0.167                 | 0.158   |
| Discorales   | 1                 | 0.000                 | 0.776   |
| Dipsacales   | 19                | 0.105                 | 0.165   |
| Dioscoreales | 1                 | 0.000                 | 0.777   |
| Cucurbitales | 1                 | 0.000                 | 0.755   |
| Cornales     | 2                 | 0.000                 | 0.597   |

|                 |     |       |       |
|-----------------|-----|-------|-------|
| Ceratophyllales | 2   | 0.000 | 0.609 |
| Celastrales     | 2   | 0.000 | 0.583 |
| Caryophyllales  | 162 | 0.272 | 0.121 |
| Brassicales     | 71  | 0.127 | 0.023 |
| Asterales       | 550 | 0.302 | 0.000 |
| Asparagales     | 78  | 0.359 | 0.007 |
| Aquifoliales    | 1   | 0.000 | 0.778 |
| Apiales         | 64  | 0.203 | 0.369 |
| angiosperms     | 3   | 0.000 | 0.456 |
| Alismatales     | 62  | 0.355 | 0.016 |
