# Supplementary material for: Extinction Risk and Diversification Are Linked in a Plant Biodiversity Hotspot
Source: PubMed Central journal article supplement (PMC3101198; doi:10.1371/journal.pbio.1000620), 2011-05-24
Supplement: pbio.1000620.s010.pdf [file pbio.1000620.s010.pdf]

**TABLE S9. UK APG taxonomic class 4**

| Taxon          | number of records | proportion threatened | p-value |
|----------------|-------------------|-----------------------|---------|
| Saxifragales   | 30                | 0.233                 | 0.561   |
| Santalales     | 2                 | 0.000                 | 0.583   |
| rosids         | 32                | 0.031                 | 0.001   |
| noncommelinids | 147               | 0.361                 | 0.000   |
| eurosids II    | 87                | 0.138                 | 0.020   |
| eurosids I     | 287               | 0.181                 | 0.015   |
| eudicots       | 69                | 0.159                 | 0.105   |
| euasterids II  | 634               | 0.285                 | 0.000   |
| euasterids I   | 220               | 0.218                 | 0.323   |
| commelinids    | 311               | 0.180                 | 0.011   |
| Caryophyllales | 162               | 0.272                 | 0.121   |
| asterids       | 50                | 0.160                 | 0.128   |
| angiosperms    | 6                 | 0.000                 | 0.213   |
