# Supplementary material for: Extinction Risk and Diversification Are Linked in a Plant Biodiversity Hotspot
Source: PubMed Central journal article supplement (PMC3101198; doi:10.1371/journal.pbio.1000620), 2011-05-24
Supplement: pbio.1000620.s011.pdf [file pbio.1000620.s011.pdf]

**TABLE S10. UK APG taxonomic class 5**

| Taxon        | number of records | proportion threatened | p-value |
|--------------|-------------------|-----------------------|---------|
| rosids       | 406               | 0.160                 | 0.000   |
| monocots     | 458               | 0.238                 | 0.390   |
| eudicots     | 69                | 0.159                 | 0.105   |
| coreeudicots | 194               | 0.263                 | 0.160   |
| asterids     | 904               | 0.262                 | 0.003   |
| angiosperms  | 6                 | 0.000                 | 0.213   |
