# Supplementary material for: Extinction Risk and Diversification Are Linked in a Plant Biodiversity Hotspot
Source: PubMed Central journal article supplement (PMC3101198; doi:10.1371/journal.pbio.1000620), 2011-05-24
Supplement: pbio.1000620.s012.pdf [file pbio.1000620.s012.pdf]

**TABLE S11. Generalized linear models of extinction risk against species richness, taxon age and diversification (genera endemic to the Cape of South Africa), weighted by number of listed species within each genus (compare with Table 1, main text).**

| model | AIC    | explanatory variable(s) | coefficient(s) | z      | p-value |
|-------|--------|-------------------------|----------------|--------|---------|
| 1     | 800.73 | species richness        | 0.60           | 9.20   | <0.001  |
| 2     | 755.04 | taxon age               | -0.40          | -10.81 | <0.001  |
| 3     | 791.38 | diversification rate    | 0.00           | 9.72   | <0.001  |
| 4     | 727.57 | species richness        | 0.38           | 5.36   | <0.001  |
|       |        | taxon age               | -0.32          | -8.30  | <0.001  |
