# Supplementary material for: Extinction Risk and Diversification Are Linked in a Plant Biodiversity Hotspot
Source: PubMed Central journal article supplement (PMC3101198; doi:10.1371/journal.pbio.1000620), 2011-05-24
Supplement: pbio.1000620.s014.pdf [file pbio.1000620.s014.pdf]

**TABLE S13. Correlation coefficients between extinction risk, species richness and taxon age, from Mantel tests controlling for phylogenetic non-independence among genera (compare with GLMs, Tables 1, S11 and S12).**

| model | explanatory variable | constant              | R     | p-value |
|-------|----------------------|-----------------------|-------|---------|
| 1     | species richness     | phylogenetic distance | 0.15  | <0.01   |
| 2     | taxon age            | phylogenetic distance | 0.061 | 0.10    |
| 3     | diversification rate | phylogenetic distance | 0.28  | <0.01   |
| 4     | species richness     | phylogenetic distance | 0.15  | <0.001  |
|       |                      | taxon age             |       |         |
| 5     | species richness     | phylogenetic distance | 0.01  | 0.40    |
|       |                      | diversification rate  |       |         |
| 6     | taxon age            | phylogenetic distance | 0.05  | 0.09    |
|       |                      | species richness      |       |         |
| 7     | taxon age            | phylogenetic distance | 0.01  | 0.33    |
|       |                      | diversification rate  |       |         |
| 8     | diversification rate | phylogenetic distance | 0.29  | <0.01   |
|       |                      | species richness      |       |         |
| 9     | diversification rate | phylogenetic distance | 0.32  | <0.01   |
|       |                      | taxon age             |       |         |
